# Supplementary material for: Biomolecular Investigation of Bartonella spp. in Wild Rodents of Two Swiss Regions
Source: MDPI journal article supplement (doi:10.3390/pathogens10101331), 2021-10-15
Supplement: s1 [file s1]

Supplementary Materials

# Biomolecular Investigation of *Bartonella* spp. in Wild Rodents of Two Swiss Regions

Sara Divari <sup>1,\*</sup>, Marta Danelli <sup>1</sup>, Paola Pregel <sup>1</sup>, Giovanni Ghielmetti <sup>2</sup>, Nicole Borel <sup>3</sup>, and Enrico Bollo <sup>1</sup>

<sup>1</sup> Department of Veterinary Science, University of Turin, Largo Braccini 2, 10095 Turin, Italy; marta.danelli@edu.unito.it (M.D.); paola.pregel@unito.it (P.P.); enrico.bollo@unito.it (E.B.)

<sup>2</sup> Institute for Food Safety and Hygiene, Section of Veterinary Bacteriology, Vetsuisse Faculty, University of Zurich, 8057 Zurich, Switzerland; giovanni.ghielmetti@vetbakt.uzh.ch

<sup>3</sup> Institute of Veterinary Pathology, Vetsuisse Faculty, University of Zurich, 8057 Zurich, Switzerland; nicole.borel@uzh.ch

\* Correspondence: sara.divari@unito.it

**Citation:** Divari, S.; Danelli, M.; Pregel, P.; Ghielmetti, G.; Borel, N.; and Bollo, E. Biomolecular Investigation of *Bartonella* spp. in Wild Rodents of Two Swiss Regions. *Pathogens* **2021**, *10*, 1331. <https://doi.org/10.3390/pathogens10101331>

Academic Editor: Edward B. Breitschwerdt

Received: 6 August 2021

Accepted: 11 October 2021

Published: 15 October 2021

**Publisher's Note:** MDPI stays neutral with regard to jurisdictional claims in published maps and institutional affiliations.

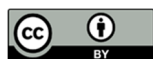

**Copyright:** © 2021 by the authors. Licensee MDPI, Basel, Switzerland. This article is an open access article distributed under the terms and conditions of the Creative Commons Attribution (CC BY) license (<http://creativecommons.org/licenses/by/4.0/>).

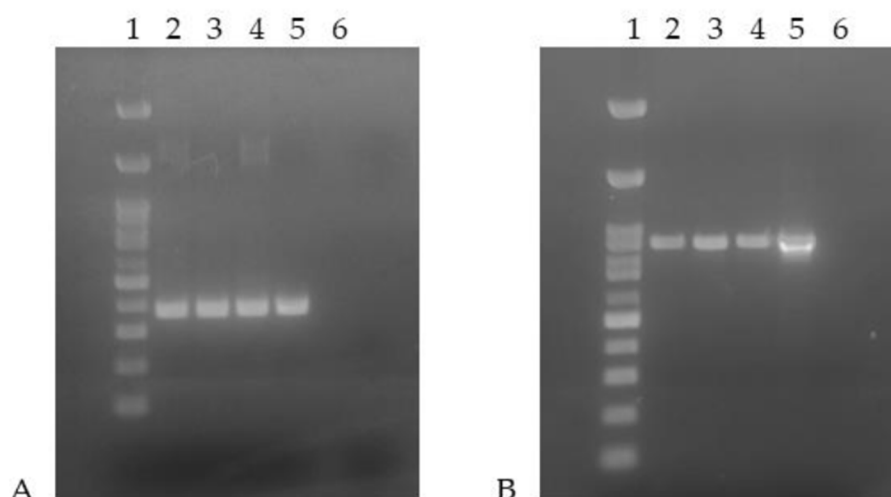

**Figure S1.** Example of gel electrophoresis for *gltA* (about 340 bp) (A) and *rpoB* (about 800 bp) PCR amplification (B) of three *Bartonella* positive samples and a positive control (DNA from *Bartonella* sp. FG4-1). Lane 1, 100 bp DNA ladder (Nippon Genetics Europe, Dürren, Germany); lane 2, sample M127; lane 3, sample M133; lane 4, sample M302; lanes 5, positive control; lane 6, no template control.

**Table S1.** Sequencing results of *Bartonella* spp. positive rodents, including the closest relative sequence (query cover 99–100%, E value 0–2,00E-180 for *gltA* and 94–100%, E value 0 for *rpoB* sequences) and identity results (ID %) for *gltA* and *rpoB* loci, number (n.), rodent species infected, and origin of trapping.

| N. Sample | Rodent Species      | ID Sample | Origin        | DNA Sequences Closest Relative (Accession No.) |       |                                                |        |
|-----------|---------------------|-----------|---------------|------------------------------------------------|-------|------------------------------------------------|--------|
|           |                     |           |               | <i>gltA</i>                                    | ID %  | <i>rpoB</i>                                    | ID %   |
| 10        | <i>Apodemus</i> sp. | M126      | Plasselb FR   | <i>Bartonella taylorii</i> (AY584853.1)        | 98.58 | <i>Bartonella taylorii</i> (AF165995.1)        | 97.06  |
|           |                     | M127      |               |                                                | 98.58 |                                                | 97.50  |
|           |                     | M172      |               |                                                | 99.15 |                                                | 100.00 |
|           |                     | M181      |               |                                                | 98.59 |                                                | 98.98  |
|           |                     | M263      |               |                                                | 99.15 |                                                | 95.88  |
|           |                     | M265      |               |                                                | 97.81 |                                                | 97.12  |
|           |                     | M266      |               |                                                | 98.34 |                                                | 96.84  |
|           |                     | M270      |               |                                                | 99.15 |                                                | 100.00 |
|           |                     | M301      |               |                                                | 98.11 |                                                | 97.03  |
|           |                     | M302      |               |                                                | 99.15 |                                                | 100.00 |
| 1         | <i>Apodemus</i> sp. | M278      | Plasselb FR   | <i>Bartonella taylorii</i> (AY584853.1)        | 98.15 | <i>Bartonella grahamii</i> as4aup (CP001562.1) | 99.65  |
|           |                     | M19       |               |                                                | 99.15 |                                                | 100.00 |
|           |                     | M40       |               |                                                | 98.58 |                                                | 97.11  |
|           |                     | M50       |               |                                                | 98.58 |                                                | 97.09  |
|           |                     | M52       |               |                                                | 99.16 |                                                | 100.00 |
|           |                     | M53       |               |                                                | 99.16 |                                                | 100.00 |
|           |                     | M66       |               |                                                | 98.56 |                                                | 97.09  |
|           |                     | M69       |               |                                                | 98.59 |                                                | 97.25  |
|           |                     | M70       |               |                                                | 98.59 |                                                | 97.03  |
|           |                     | M71       |               |                                                | 99.15 |                                                | 99.88  |
| 21        | <i>Apodemus</i> sp. | M72       | Riggisberg BE | <i>Bartonella taylorii</i> (AY584853.1)        | 98.29 | <i>Bartonella taylorii</i> (AF165995.1)        | 97.09  |
|           |                     | M74       |               |                                                | 99.15 |                                                | 100.00 |
|           |                     | M75       |               |                                                | 98.59 |                                                | 97.06  |
|           |                     | M76       |               |                                                | 98.57 |                                                | 97.21  |
|           |                     | M77       |               |                                                | 98.56 |                                                | 97.21  |
|           |                     | M79       |               |                                                | 98.58 |                                                | 97.09  |
|           |                     | M80       |               |                                                | 98.59 |                                                | 97.09  |
|           |                     | M247      |               |                                                | 98.58 |                                                | 97.09  |

|   |                          |      |               |                                         |       |                                         |        |
|---|--------------------------|------|---------------|-----------------------------------------|-------|-----------------------------------------|--------|
|   |                          | M279 |               |                                         | 98.37 |                                         | 97.09  |
|   |                          | M294 |               |                                         | 98.55 |                                         | 97.09  |
|   |                          | M296 |               |                                         | 98.58 |                                         | 97.21  |
|   |                          | M340 |               |                                         | 99.15 |                                         | 100.00 |
|   |                          | M6   |               |                                         | 98.58 | No amplicon                             |        |
| 3 | <i>Apodemus</i> sp.      | M78  | Riggisberg BE | <i>Bartonella taylorii</i> (AY584853.1) | 94.03 | No amplicon                             |        |
|   |                          | M30  |               |                                         | 96.62 | No amplicon                             |        |
|   |                          | M107 |               |                                         | 98.58 |                                         | 96.97  |
|   |                          | M112 |               |                                         | 98.56 |                                         | 97.21  |
|   |                          | M187 |               |                                         | 99.44 |                                         | 97.33  |
| 7 | <i>Arvicola sherman</i>  | M188 | Plasselb FR   | <i>Bartonella taylorii</i> (AY584853.1) | 98.58 | <i>Bartonella taylorii</i> (AF165995.1) | 96.97  |
|   |                          | M189 |               |                                         | 99.44 |                                         | 97.33  |
|   |                          | M203 |               |                                         | 98.58 |                                         | 96.97  |
|   |                          | M220 |               |                                         | 98.58 |                                         | 96.97  |
|   |                          | M129 |               |                                         | 98.58 |                                         | 97.19  |
|   |                          | M135 |               |                                         | 98.57 |                                         | 97.21  |
|   |                          | M142 |               |                                         | 99.72 |                                         | 97.33  |
| 8 | <i>Myodes glareolus</i>  | M174 | Plasselb FR   | <i>Bartonella taylorii</i> (AY584853.1) | 98.57 | <i>Bartonella taylorii</i> (AF165995.1) | 97.21  |
|   |                          | M182 |               |                                         | 99.72 |                                         | 97.33  |
|   |                          | M183 |               |                                         | 99.72 |                                         | 97.33  |
|   |                          | M262 |               |                                         | 99.44 |                                         | 97.94  |
|   |                          | M303 |               |                                         | 99.72 |                                         | 97.33  |
|   |                          | M3   |               |                                         | 98.31 |                                         | 97.27  |
|   |                          | M28  |               |                                         | 99.71 |                                         | 97.33  |
|   |                          | M32  |               |                                         | 99.45 |                                         | 97.33  |
|   |                          | M36  |               |                                         | 99.72 |                                         | 97.33  |
| 9 | <i>Myodes glareolus</i>  | M54  | Riggisberg BE | <i>Bartonella taylorii</i> (AY584853.1) | 98.01 | <i>Bartonella taylorii</i> (AF165995.1) | 97.28  |
|   |                          | M244 |               |                                         | 99.72 |                                         | 97.33  |
|   |                          | M245 |               |                                         | 98.29 |                                         | 97.21  |
|   |                          | M292 |               |                                         | 98.58 |                                         | 97.21  |
|   |                          | M293 |               |                                         | 99.71 |                                         | 97.33  |
| 1 | <i>Microtus agrestis</i> | M42  | Riggisberg BE | <i>Bartonella doshiae</i> (Z70017.1)    | 100   | No amplicon                             |        |
| 2 | <i>Arvicola sherman</i>  | M202 | Plasselb FR   | <i>Bartonella doshiae</i> (Z70017.1)    | 100   | No amplicon                             |        |

|   |                         |      |               |                                                     |       |                                                     |        |
|---|-------------------------|------|---------------|-----------------------------------------------------|-------|-----------------------------------------------------|--------|
|   |                         | M221 |               |                                                     | 94.82 | No amplicon                                         |        |
| 1 | <i>Myodes glareolus</i> | M261 | Plasselb FR   | <i>Bartonella grahamii</i> as4aup (CP001562.1)      | 100   | <i>Bartonella grahamii</i> as4aup (CP001562.1)      | 99.88  |
| 2 | <i>Apodemus</i> sp.     | M21  | Riggisberg BE | <i>Bartonella</i> sp. (Z70012.1)                    | 98.59 | No amplicon                                         |        |
|   |                         | M41  |               |                                                     | 98.60 | Very low quality sequence                           |        |
| 1 | <i>Apodemus</i> sp.     | M67  | Riggisberg BE | <i>Bartonella</i> sp. (Z70012.1)                    | 98.48 | <i>Bartonella birtlesii</i> (AB196425.1)            | 100.00 |
| 1 | <i>Apodemus</i> sp.     | M133 | Plasselb FR   | <i>Bartonella</i> sp. (Z70012.1)                    | 98.59 | <i>Bartonella birtlesii</i> (AB196425.1)            | 100.00 |
|   |                         | M33  |               |                                                     | 100   | No amplicon                                         |        |
| 3 | <i>Myodes glareolus</i> | M35  | Riggisberg BE | <i>Candidatus Bartonella rudakovii</i> (EF682090.1) | 100   | No amplicon                                         |        |
|   |                         | M68  |               |                                                     | 100   | No amplicon                                         |        |
| 1 | <i>Myodes glareolus</i> | M246 | Riggisberg BE | <i>Candidatus Bartonella rudakovii</i> (EF682090.1) | 100   | <i>Candidatus Bartonella rudakovii</i> (EF682088.1) | 99.87  |
| 1 | <i>Myodes glareolus</i> | M31  | Riggisberg BE | Very low quality sequence                           |       | No amplicon                                         |        |
| 1 | <i>Apodemus</i> sp.     | M342 | Riggisberg BE | Aspecific sequence                                  |       | <i>Bartonella taylorii</i> (AF165995.1)             | 97.12  |
| 1 | <i>Apodemus</i> sp.     | M267 | Plasselb FR   | No amplicon                                         |       | <i>Bartonella grahamii</i> as4aup (CP001562.1)      | 99.65  |
| 1 | <i>Myodes glareolus</i> | M297 | Riggisberg BE | No amplicon                                         |       | Very low quality sequence                           |        |

ND: not detectable

**Table S2.** Melting temperature (T<sub>m</sub>) calculated for DNA of the positive control (*Bartonella* sp. FG4-1) and of three positive samples analysed by qPCR for ITS region of *Bartonella* spp. (about 200 bp).

| ID Animals | T <sub>m</sub> (°C) Mean ± Standard Deviation |
|------------|-----------------------------------------------|
| FG4-1      | 81.00 ± 0.00                                  |
| M127       | 81.55 ± 0.16                                  |
| M133       | 80.50 ± 0.53                                  |
| M302       | 81.30 ± 0.35                                  |

**Table S3.** Accession number of sequences deposited in GenBank.

| ID samples | Accession numbers |             |
|------------|-------------------|-------------|
|            | <i>gltA</i>       | <i>rpoB</i> |
| M3         | MZ680369          | MZ680440    |
| M6         | MZ680370          |             |
| M19        | MZ680371          | MZ680441    |
| M21        | MZ680372          |             |
| M28        | MZ680373          | MZ680442    |
| M30        | MZ680374          |             |
| M32        | MZ680375          | MZ680443    |
| M33        | MZ680376          |             |
| M35        | MZ680377          |             |
| M36        | MZ680378          | MZ680444    |
| M40        | MZ680379          | MZ680445    |
| M41        | MZ680380          |             |
| M42        | MZ680381          |             |
| M50        | MZ680382          | MZ680446    |
| M52        | MZ680383          | MZ680447    |
| M53        | MZ680384          | MZ680448    |
| M54        | MZ680385          | MZ680449    |
| M66        | MZ680386          | MZ680450    |
| M67        | MZ680387          | MZ680451    |
| M68        | MZ680388          |             |
| M69        | MZ680389          | MZ680452    |
| M70        | MZ680390          | MZ680453    |
| M71        | MZ680391          | MZ680454    |
| M72        | MZ680392          | MZ680455    |
| M74        | MZ680393          | MZ680456    |
| M75        | MZ680394          | MZ680457    |
| M76        | MZ680395          | MZ680458    |
| M77        | MZ680396          | MZ680459    |
| M78        | MZ680397          |             |
| M79        | MZ680398          | MZ680460    |
| M80        | MZ680399          | MZ680461    |
| M107       | MZ680400          | MZ680462    |
| M112       | MZ680401          | MZ680463    |
| M126       | MZ680402          | MZ680464    |
| M127       | MZ680403          | MZ680465    |
| M129       | MZ680404          | MZ680466    |
| M133       | MZ680405          | MZ680467    |
| M135       | MZ680406          | MZ680468    |
| M142       | MZ680407          | MZ680469    |
| M172       | MZ680408          | MZ680470    |

---

|      |          |          |
|------|----------|----------|
| M174 | MZ680409 | MZ680471 |
| M181 | MZ680410 | MZ680472 |
| M182 | MZ680411 | MZ680473 |
| M183 | MZ680412 | MZ680474 |
| M187 | MZ680413 | MZ680475 |
| M188 | MZ680414 | MZ680476 |
| M189 | MZ680415 | MZ680477 |
| M202 | MZ680416 |          |
| M203 | MZ680417 | MZ680478 |
| M220 | MZ680418 | MZ680479 |
| M221 | MZ680419 |          |
| M244 | MZ680420 | MZ680480 |
| M245 | MZ680421 | MZ680481 |
| M246 | MZ680422 | MZ680482 |
| M247 | MZ680423 | MZ680483 |
| M261 | MZ680424 | MZ680484 |
| M262 | MZ680425 | MZ680485 |
| M263 | MZ680426 | MZ680486 |
| M265 | MZ680427 | MZ680487 |
| M266 | MZ680428 | MZ680488 |
| M267 |          | MZ680489 |
| M270 | MZ680429 | MZ680490 |
| M278 | MZ680430 | MZ680491 |
| M279 | MZ680431 | MZ680492 |
| M292 | MZ680432 | MZ680493 |
| M293 | MZ680433 | MZ680494 |
| M294 | MZ680434 | MZ680495 |
| M296 | MZ680435 | MZ680496 |
| M301 | MZ680436 | MZ680497 |
| M302 | MZ680437 | MZ680498 |
| M303 | MZ680438 | MZ680499 |
| M340 | MZ680439 | MZ680500 |
| M342 |          | MZ680501 |

---
